# Supplementary material for: A formal intermolecular [4 + 2] cycloaddition reaction of 1,3-disubstituted indoles and alkylquinones
Source: Royal Society of Chemistry journal article supplement (doi:10.1039/c7ob00392g), 2017-01-01

*Supporting Information for*

**A Formal Intermolecular [4+2] Cycloaddition Reaction of 1,3-  
Disubstituted Indoles and Alkylquinone**

Chao Lin, Hong-Jin Du, Hui Zhao, Ding-Fei Yan, Nai-Xin Liu, Hongbin Sun, Xiaoran  
Wen\* and Qing-Long Xu\*

Jiangsu Key Laboratory of Drug Discovery for Metabolic Disease and State Key  
Laboratory of Natural Medicines, China Pharmaceutical University, 24 Tongjia Xiang,  
Nanjing 210009, China

E-mail: qlxu@cpu.edu.cn; wxagj@126.com

**Table of Contents**

Spectra copies of NMR.....S2

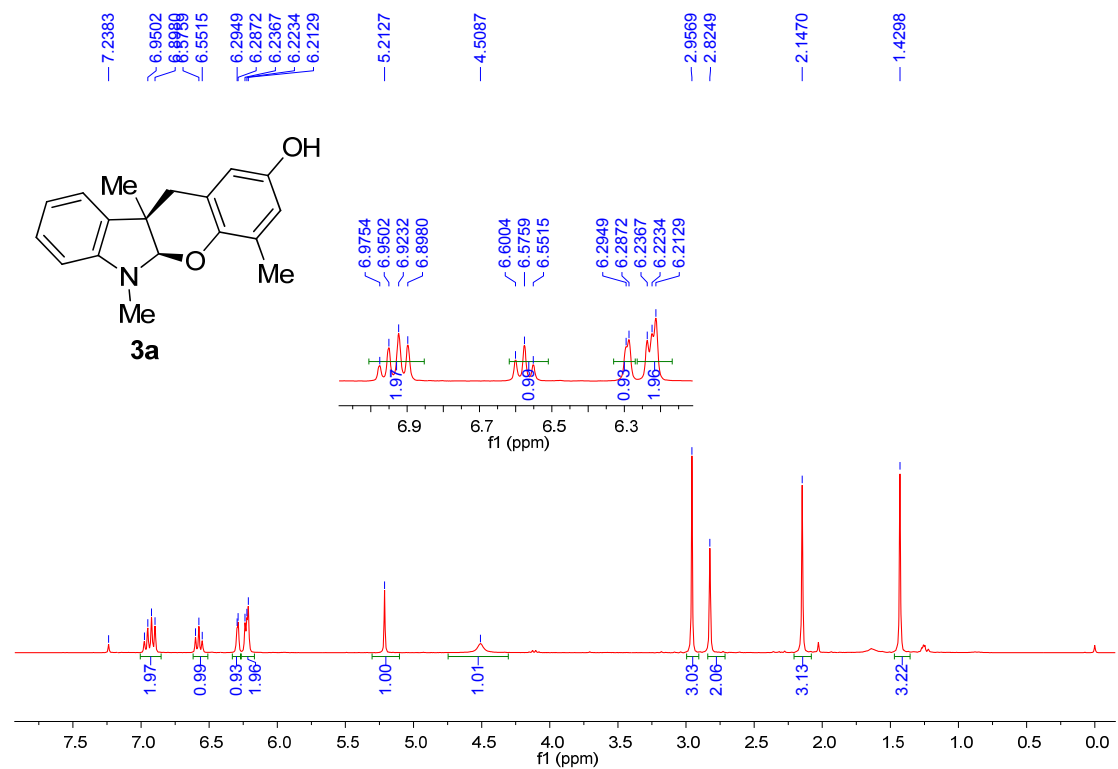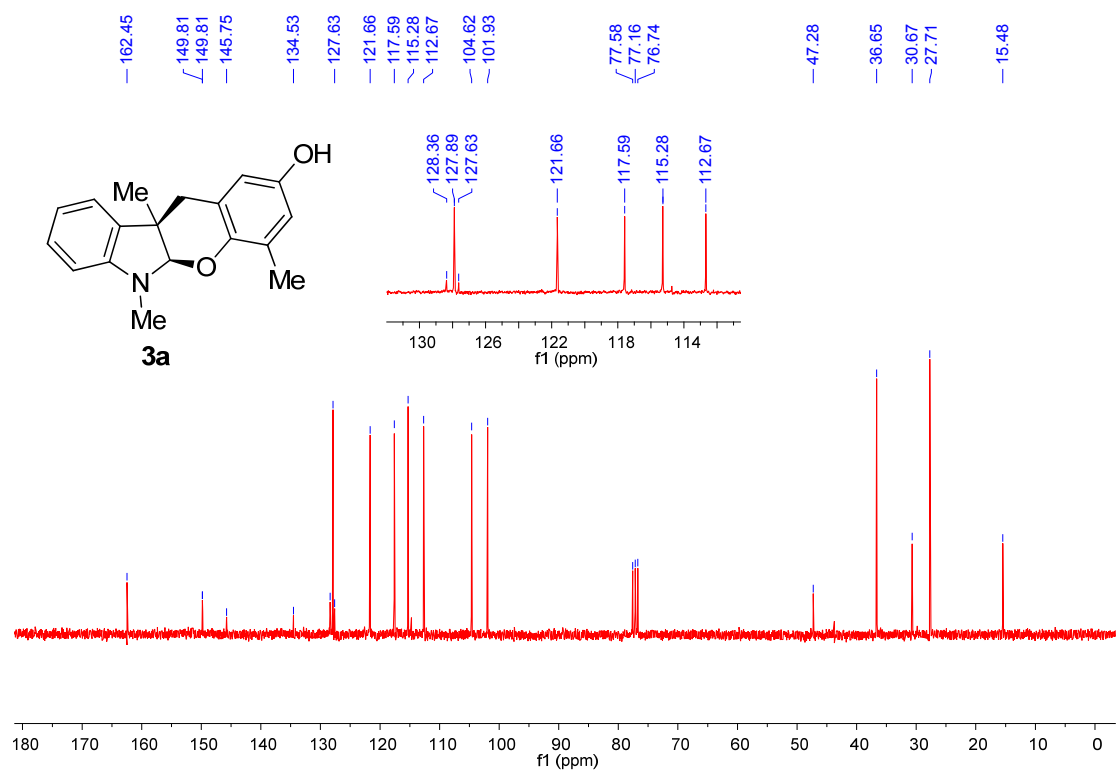

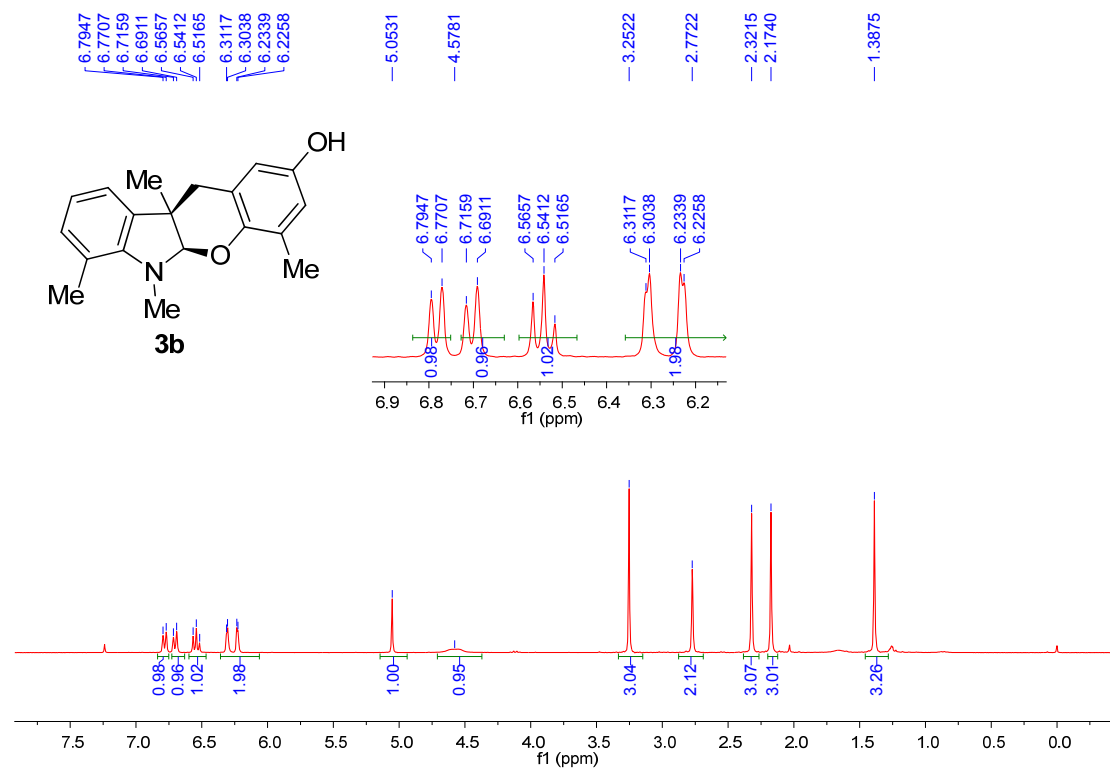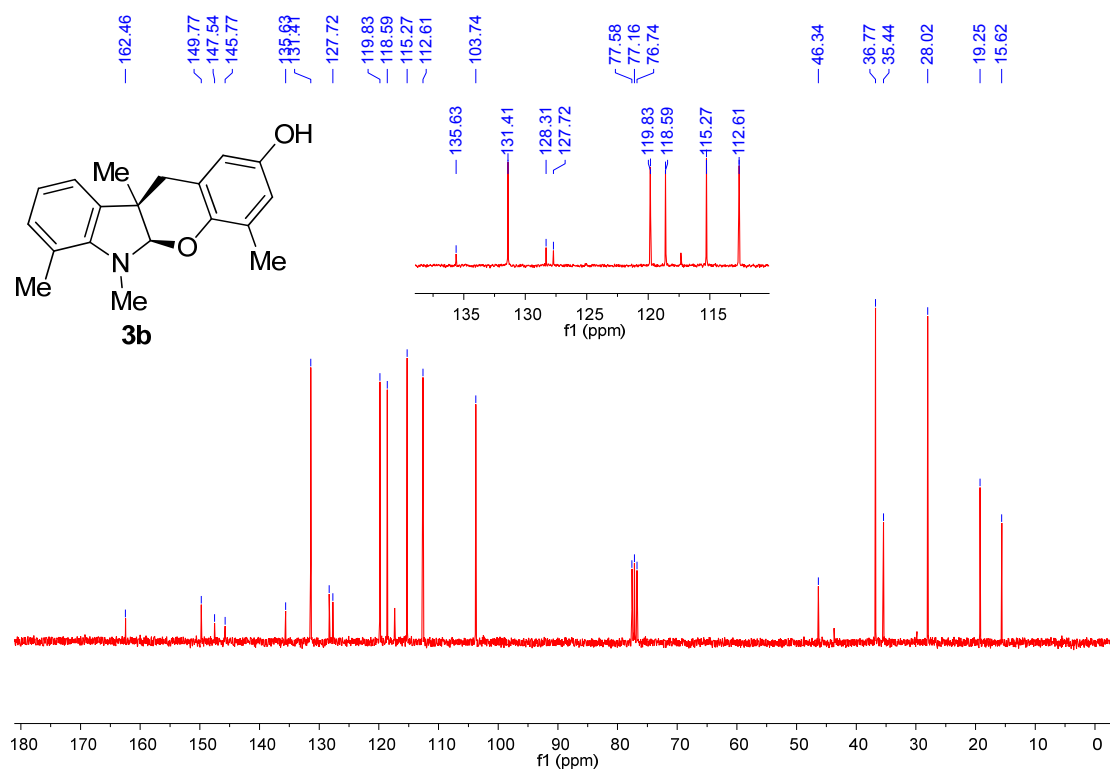

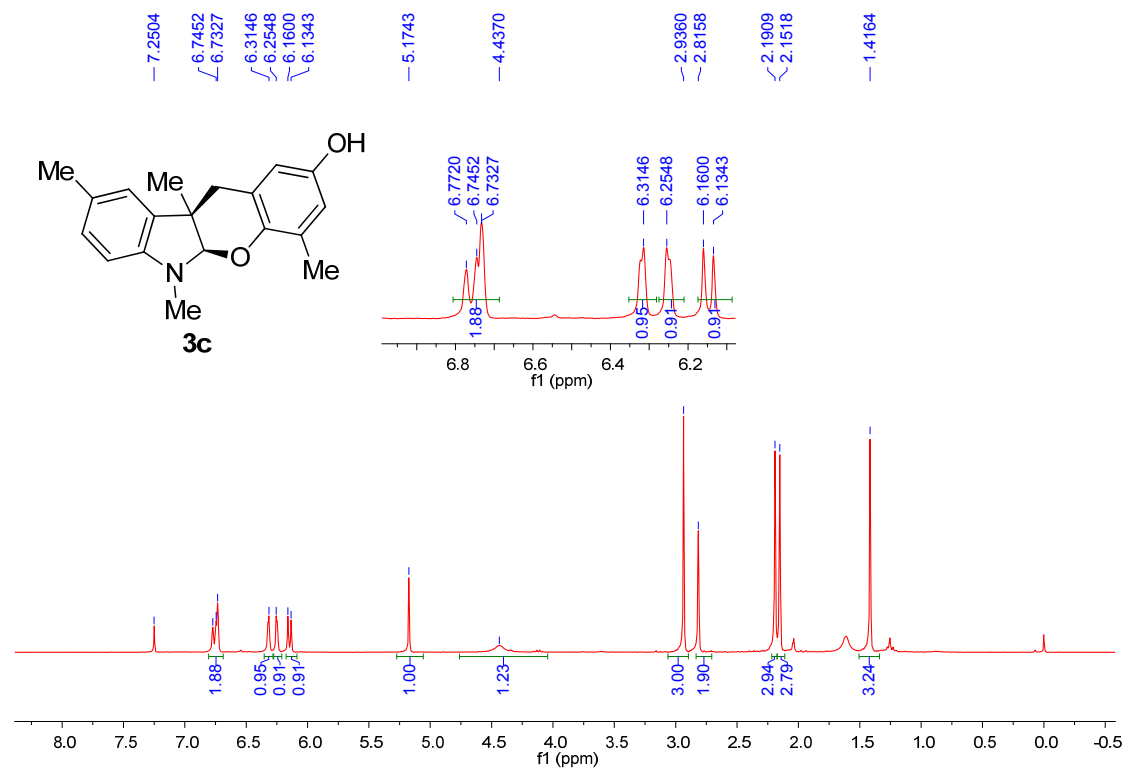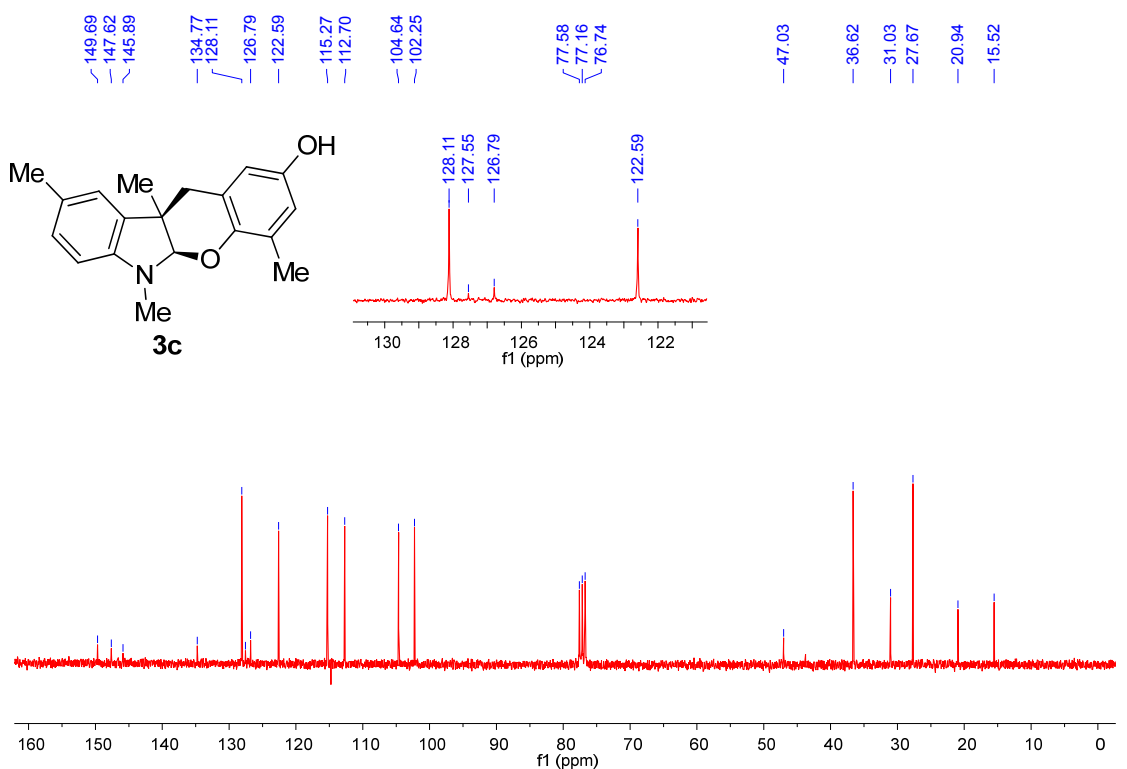

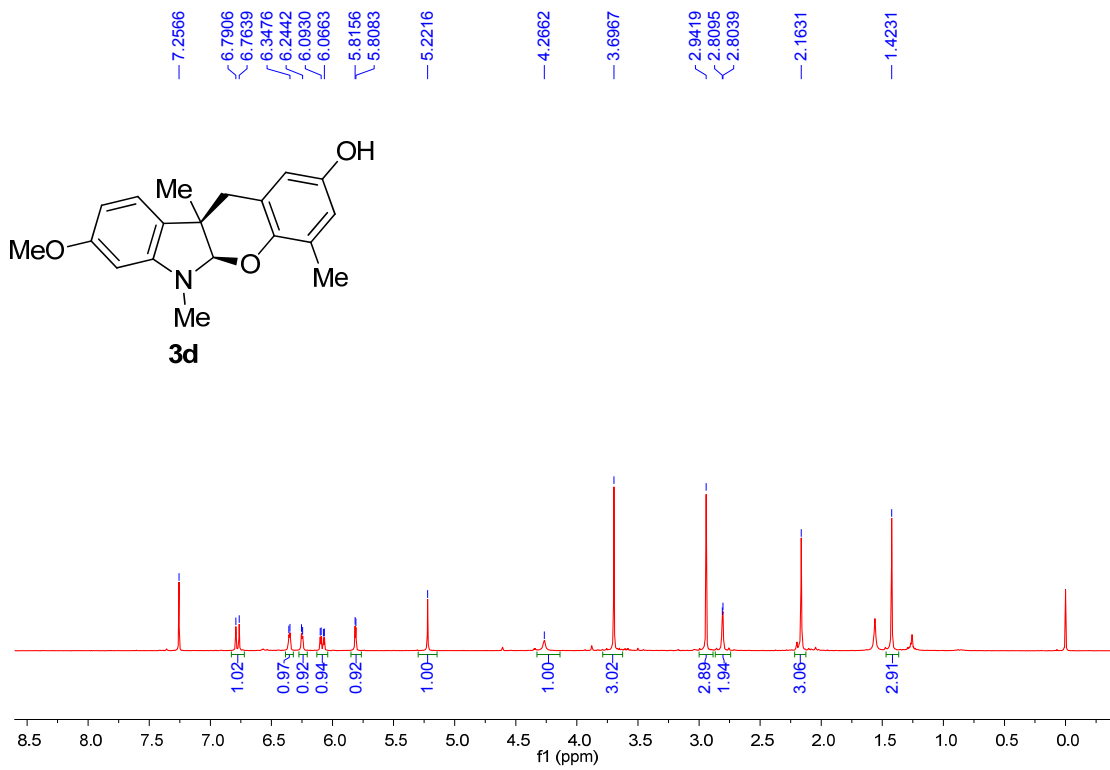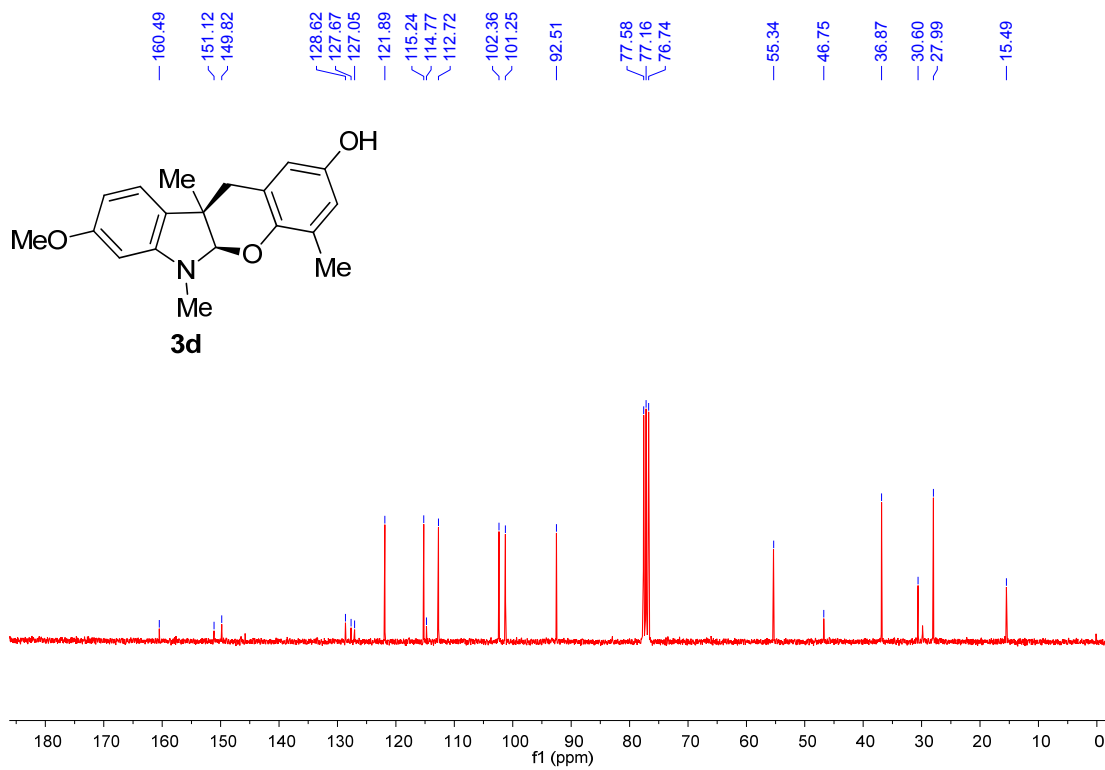

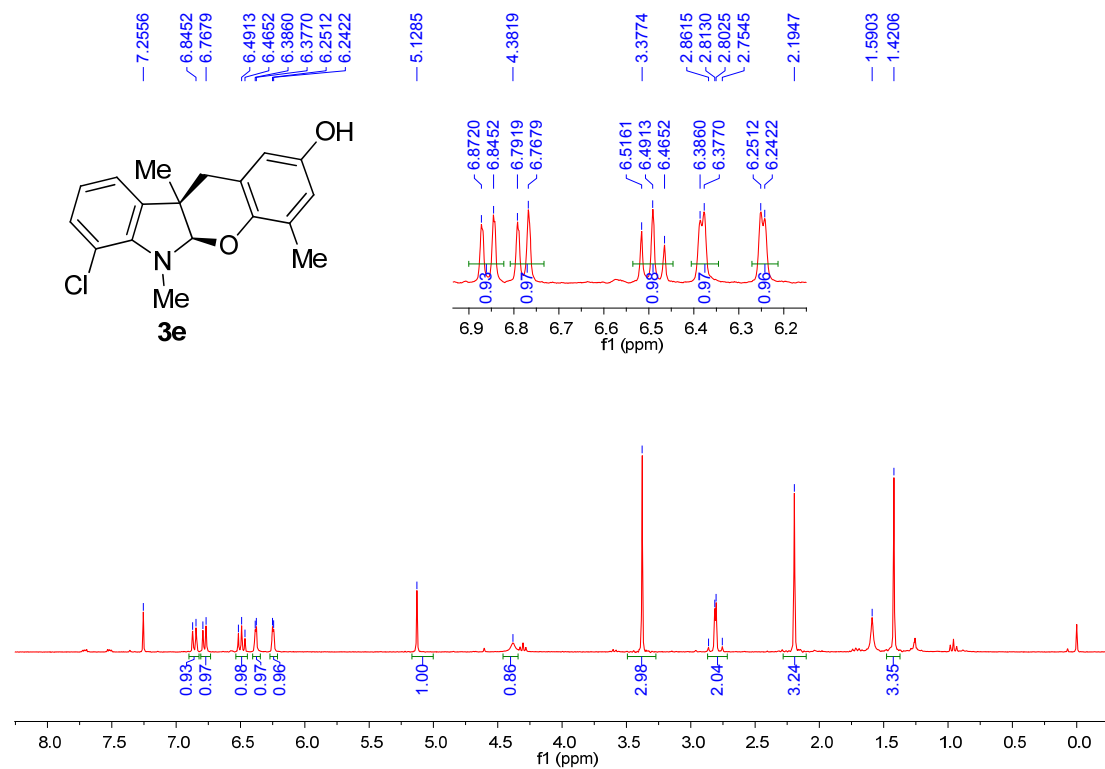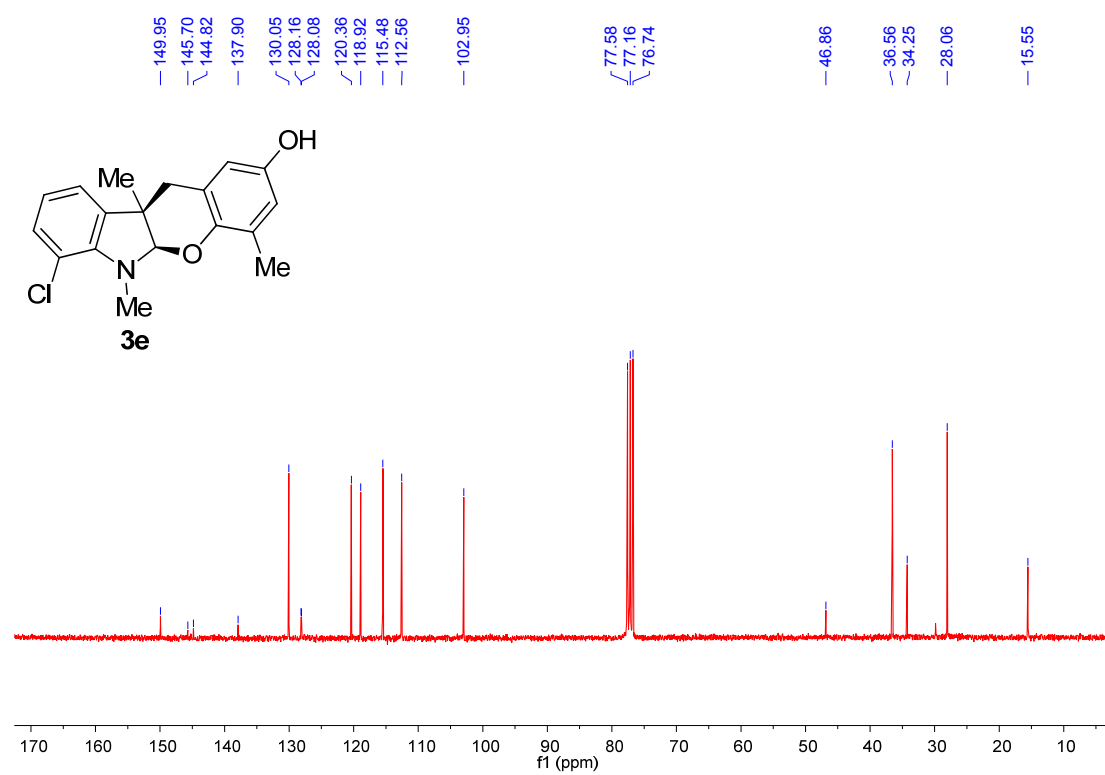

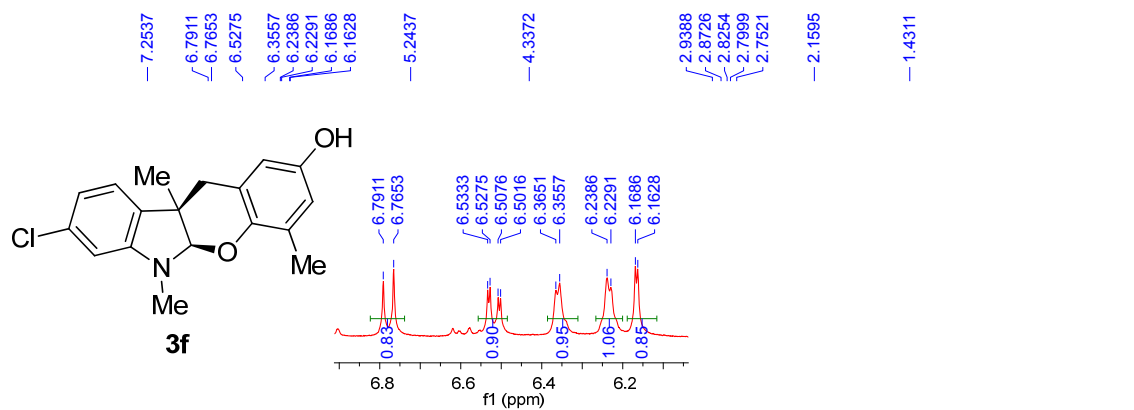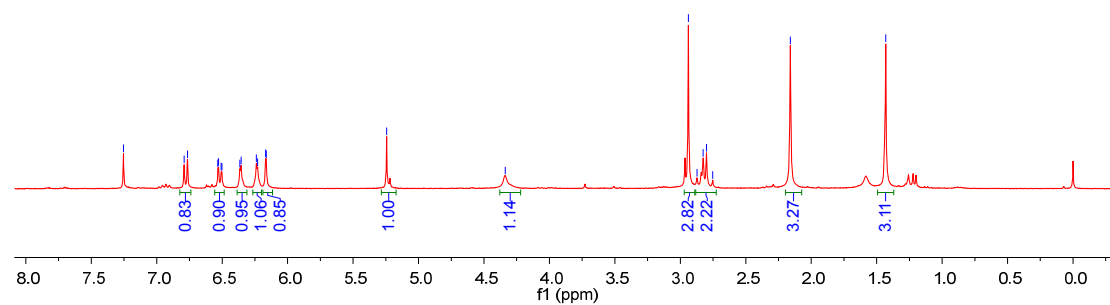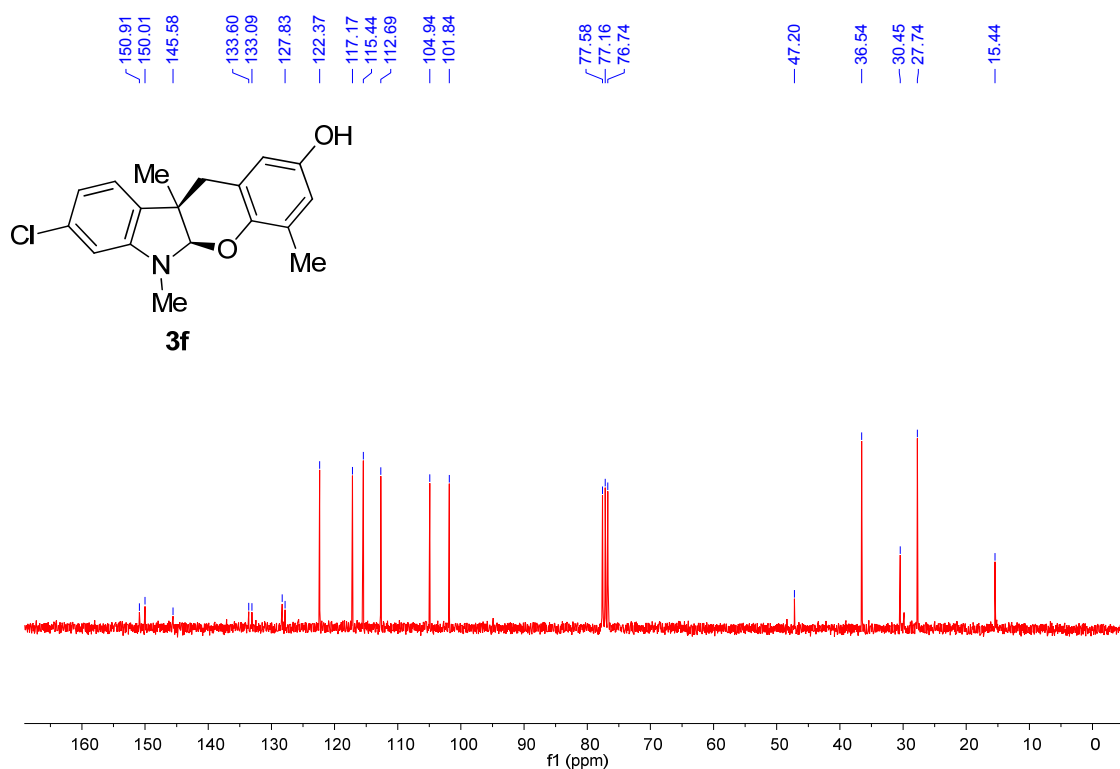

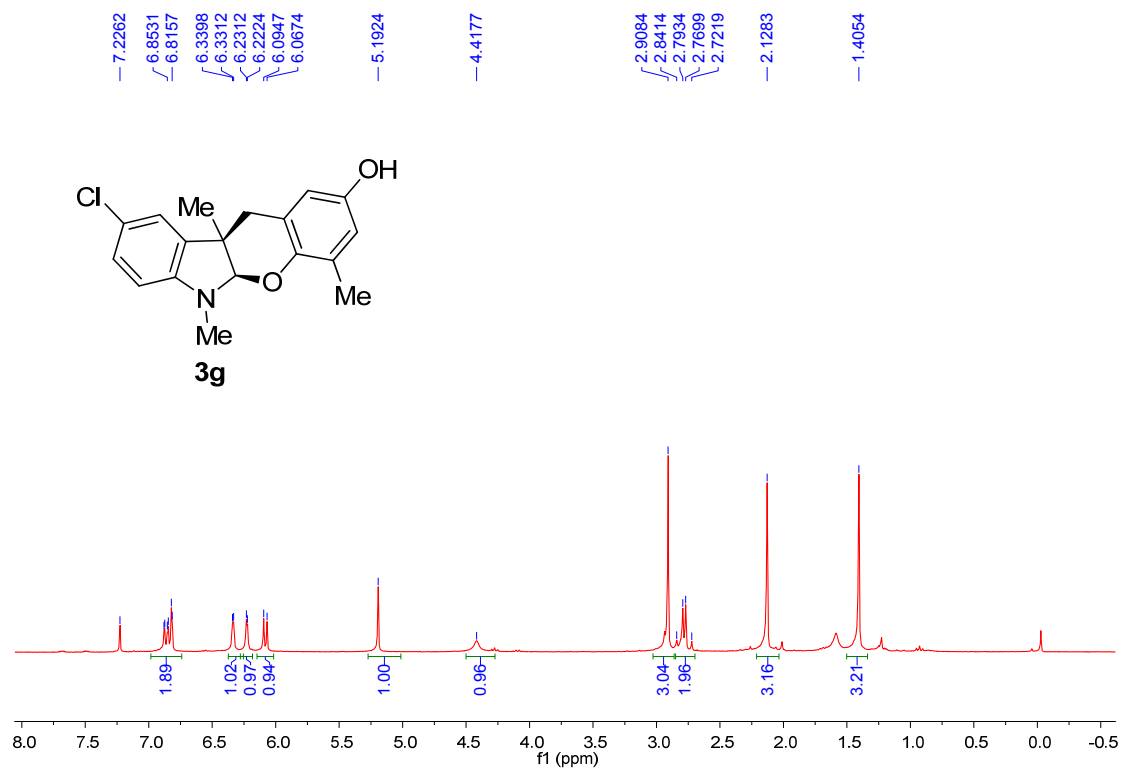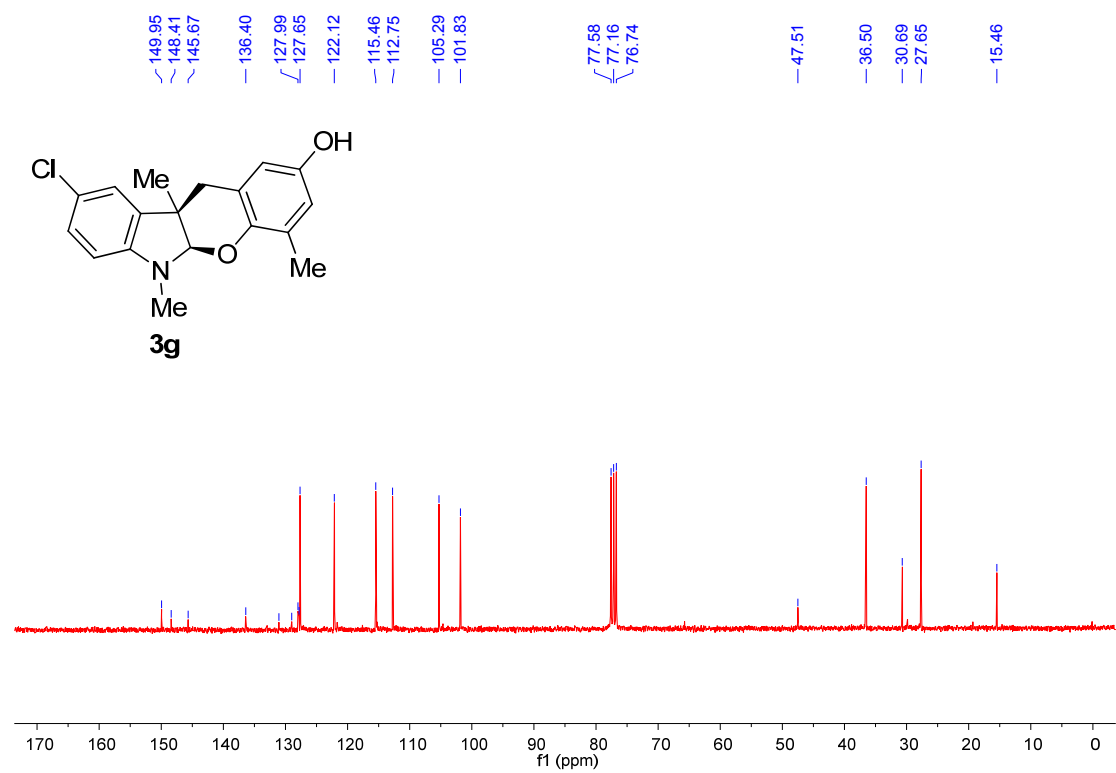



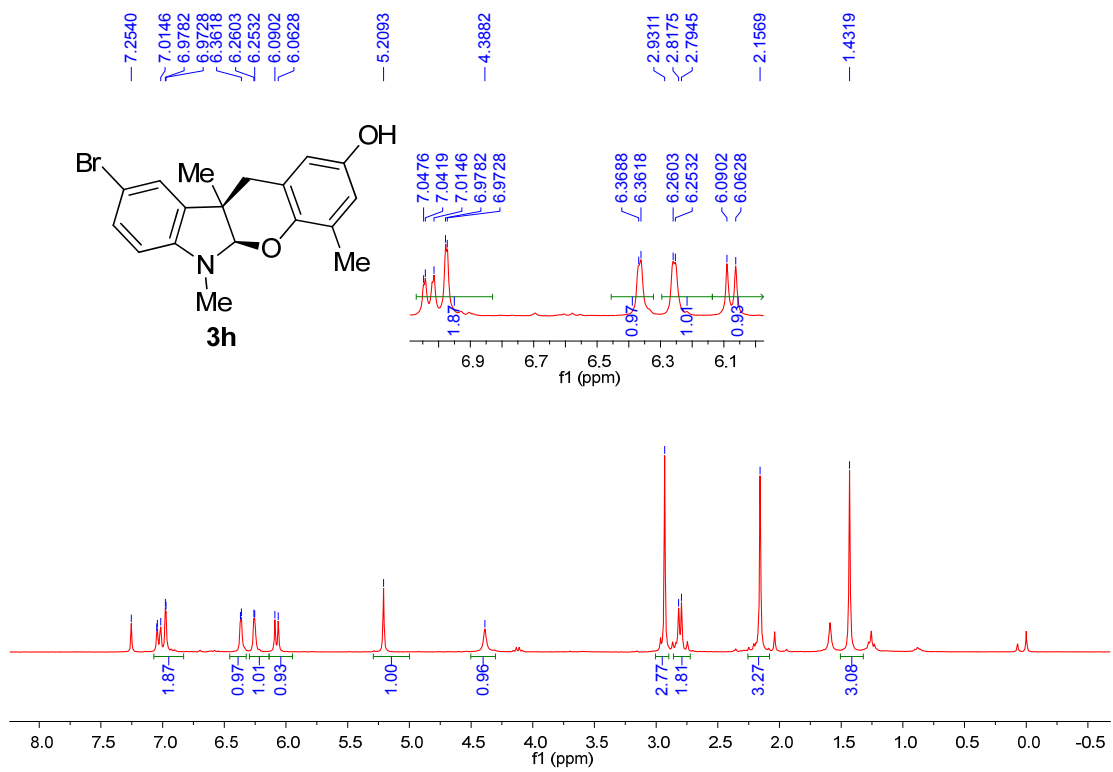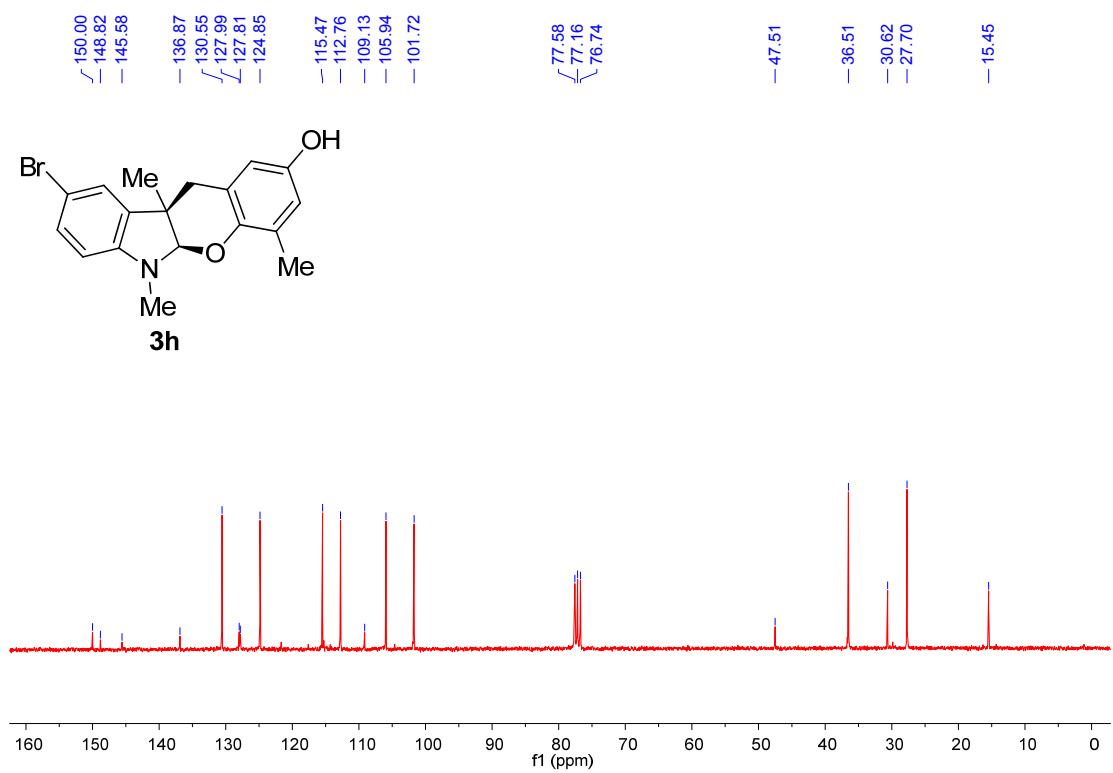

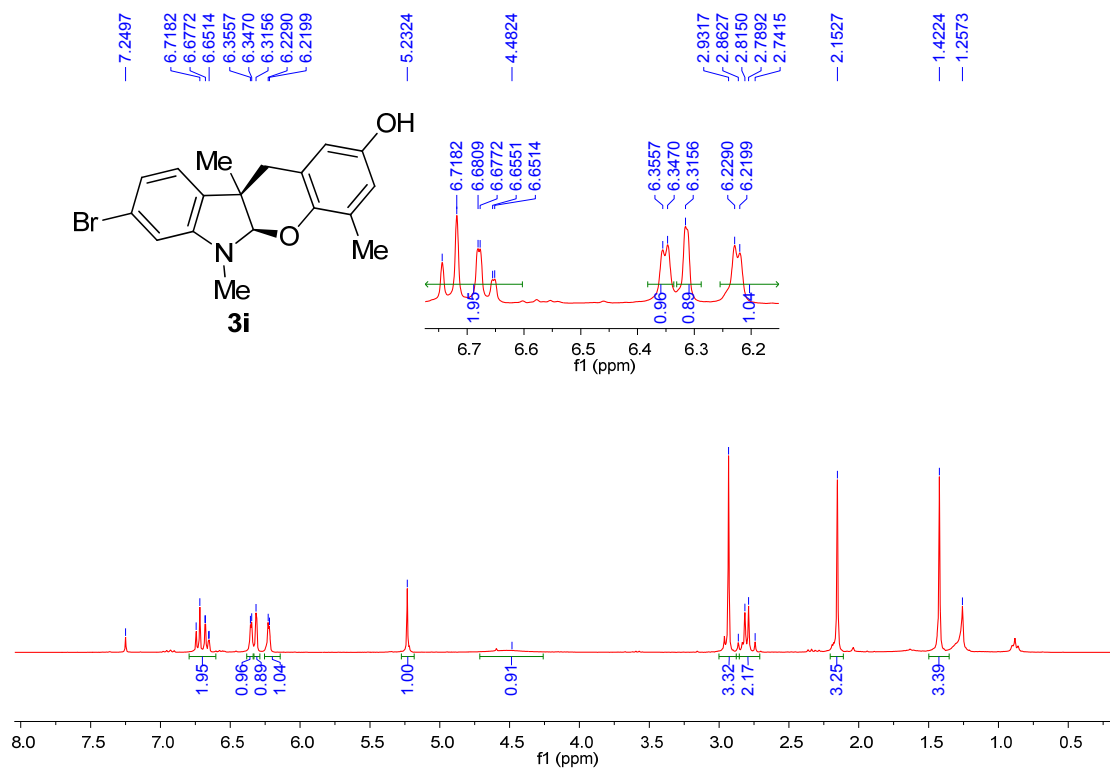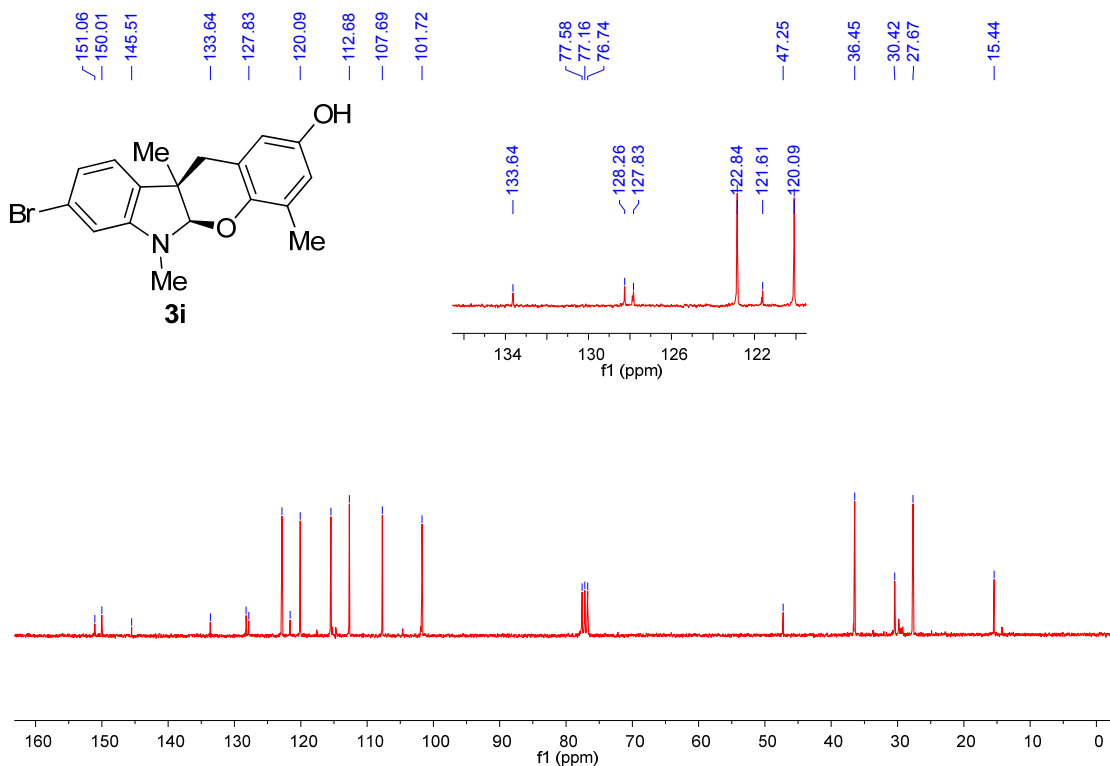

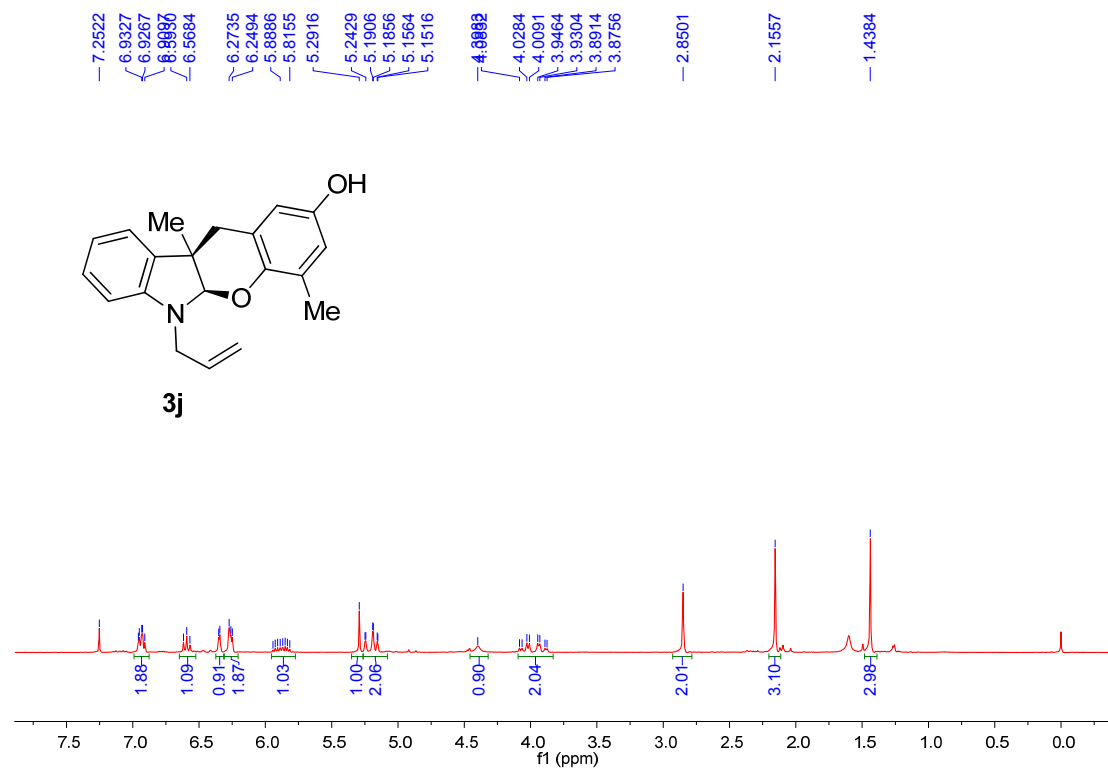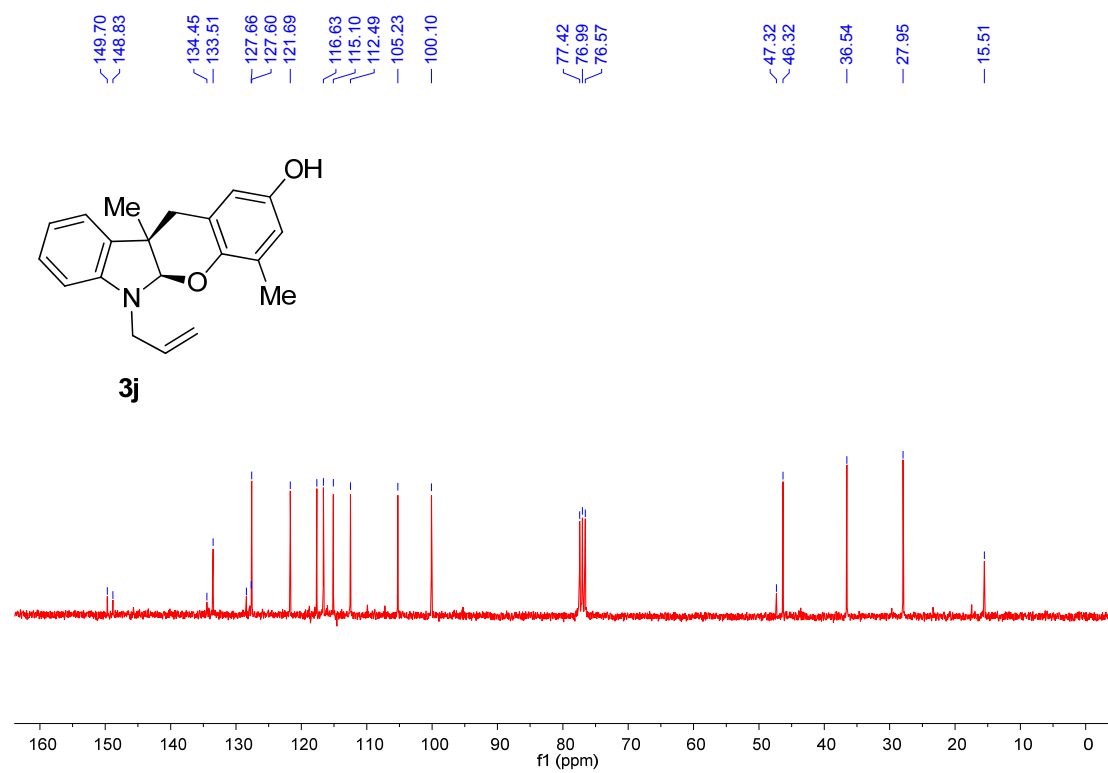

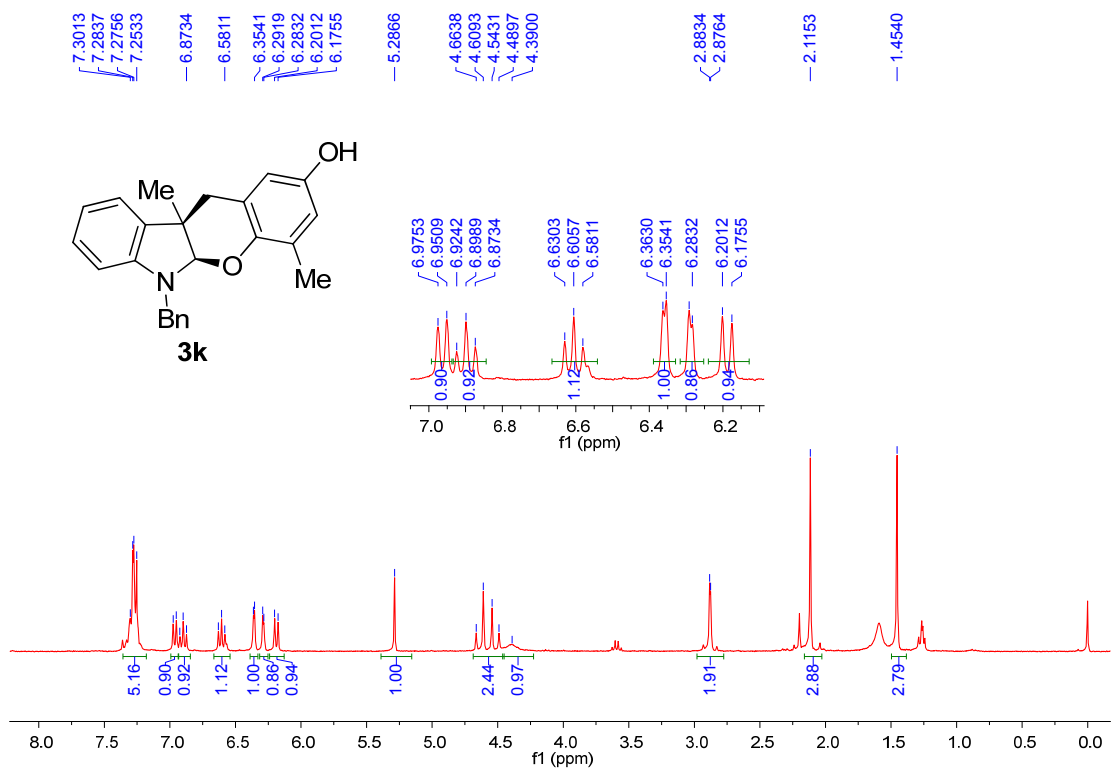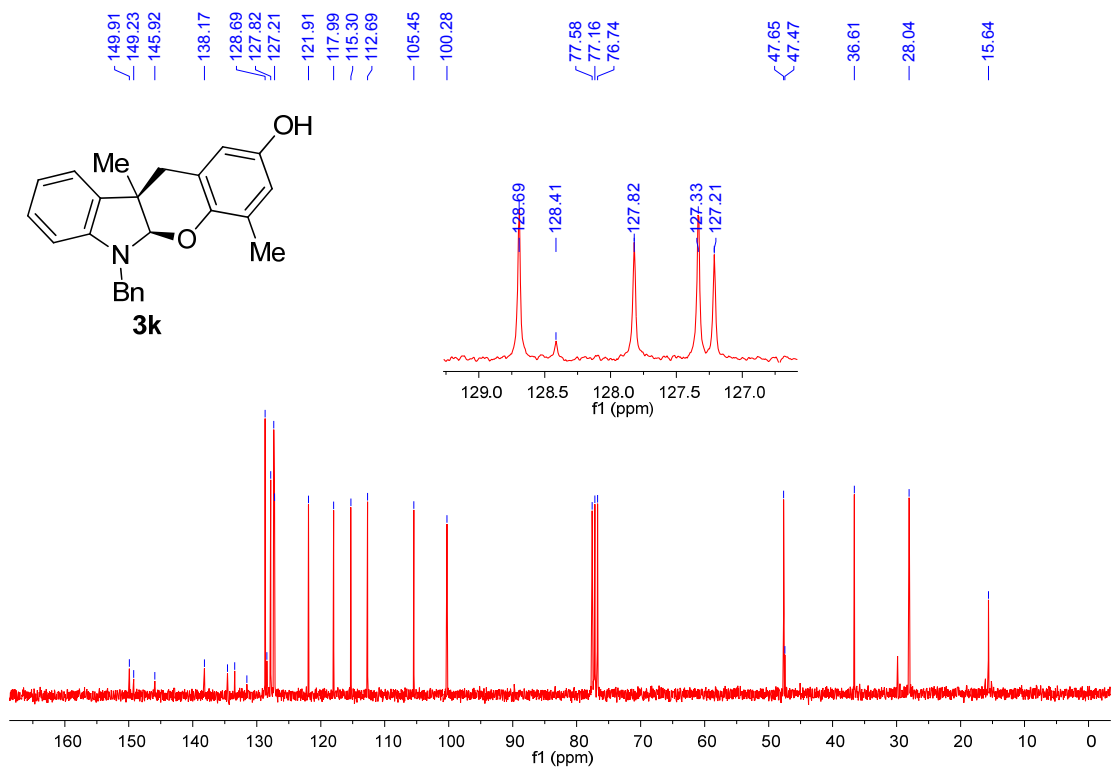

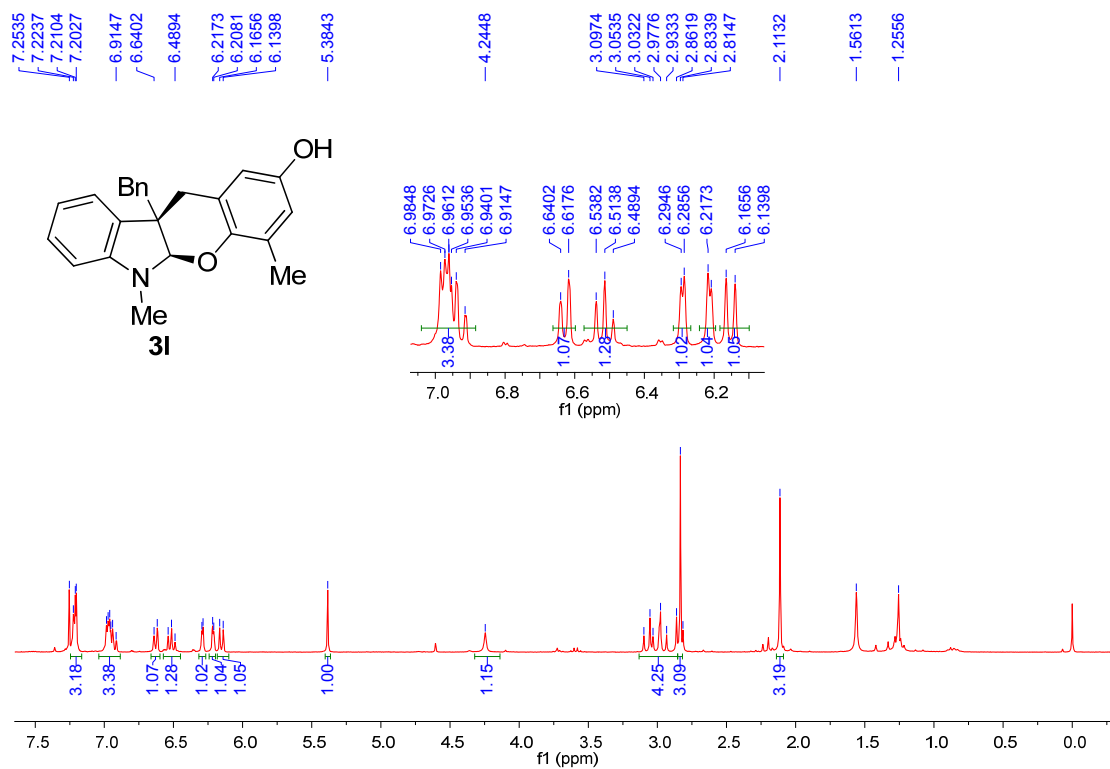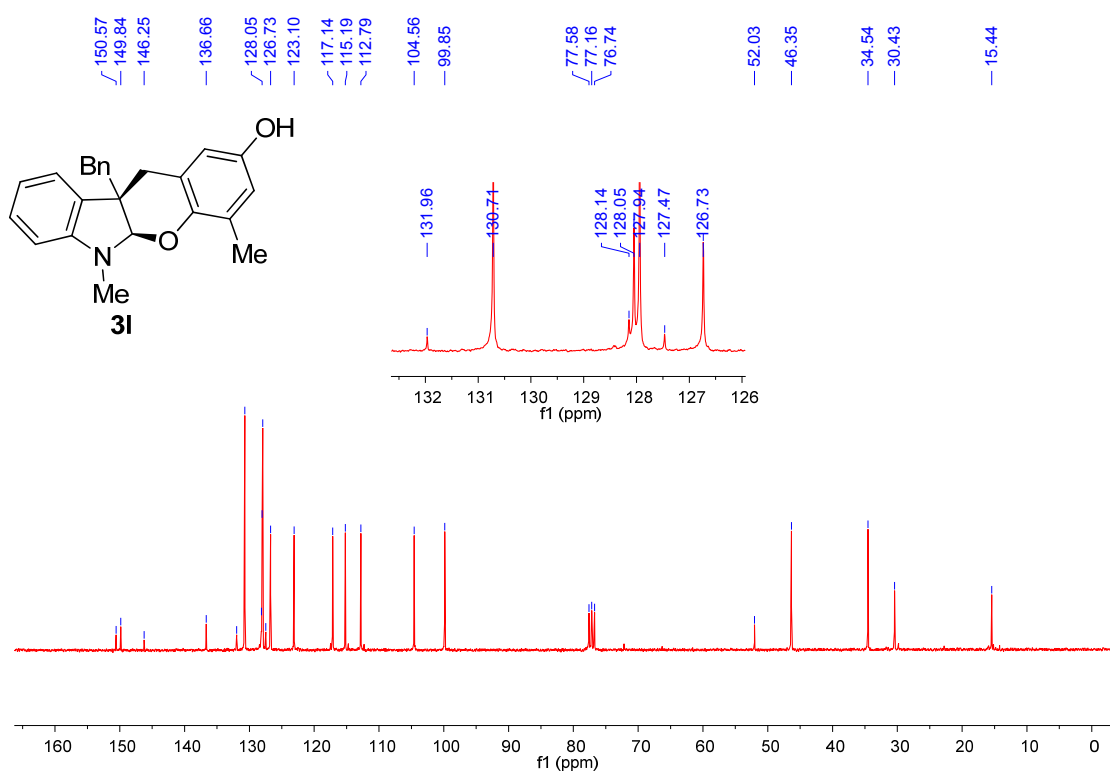

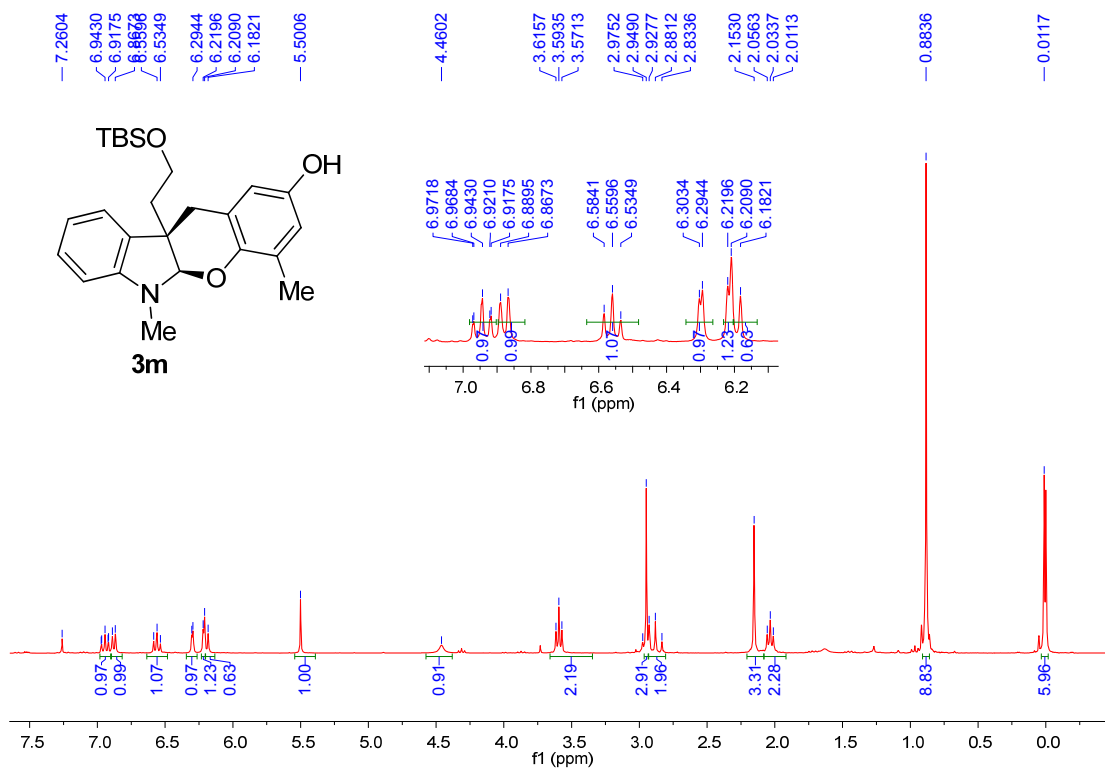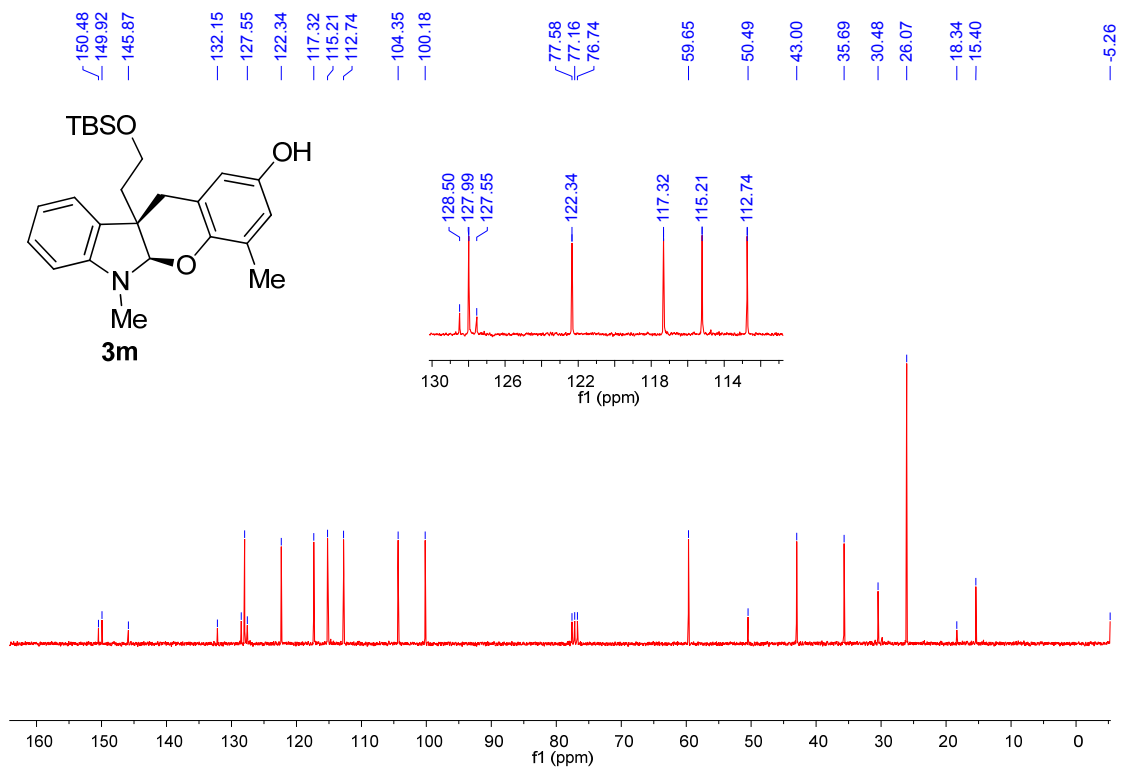

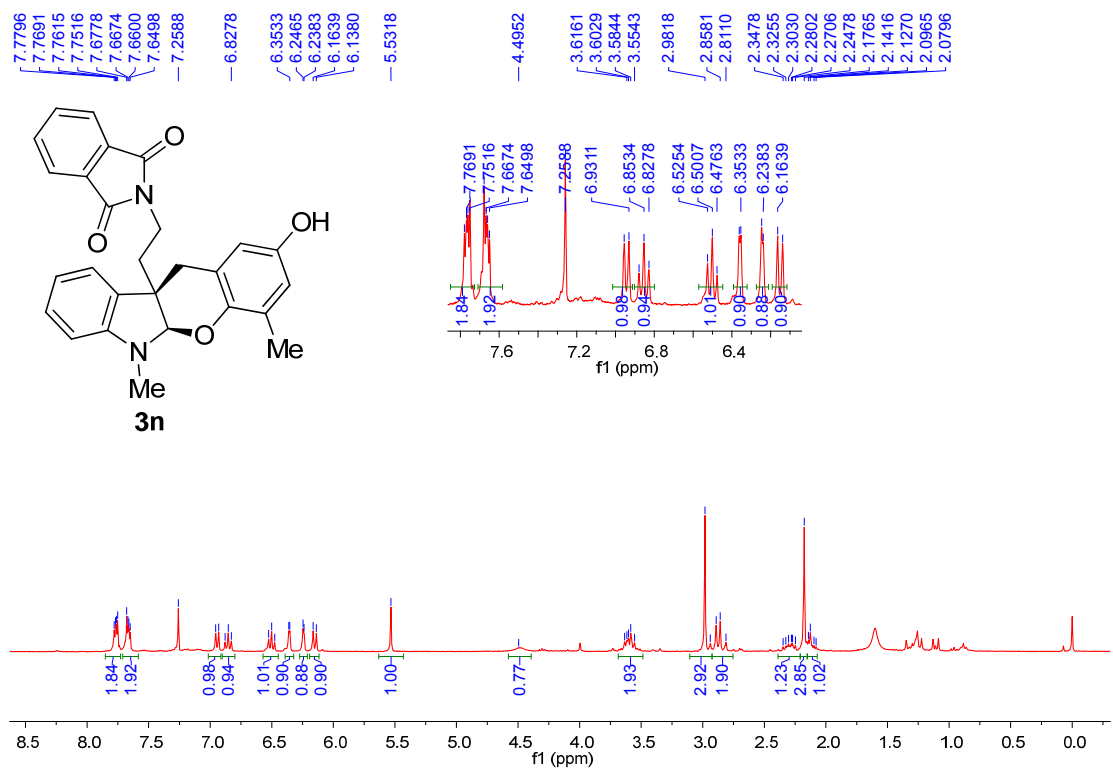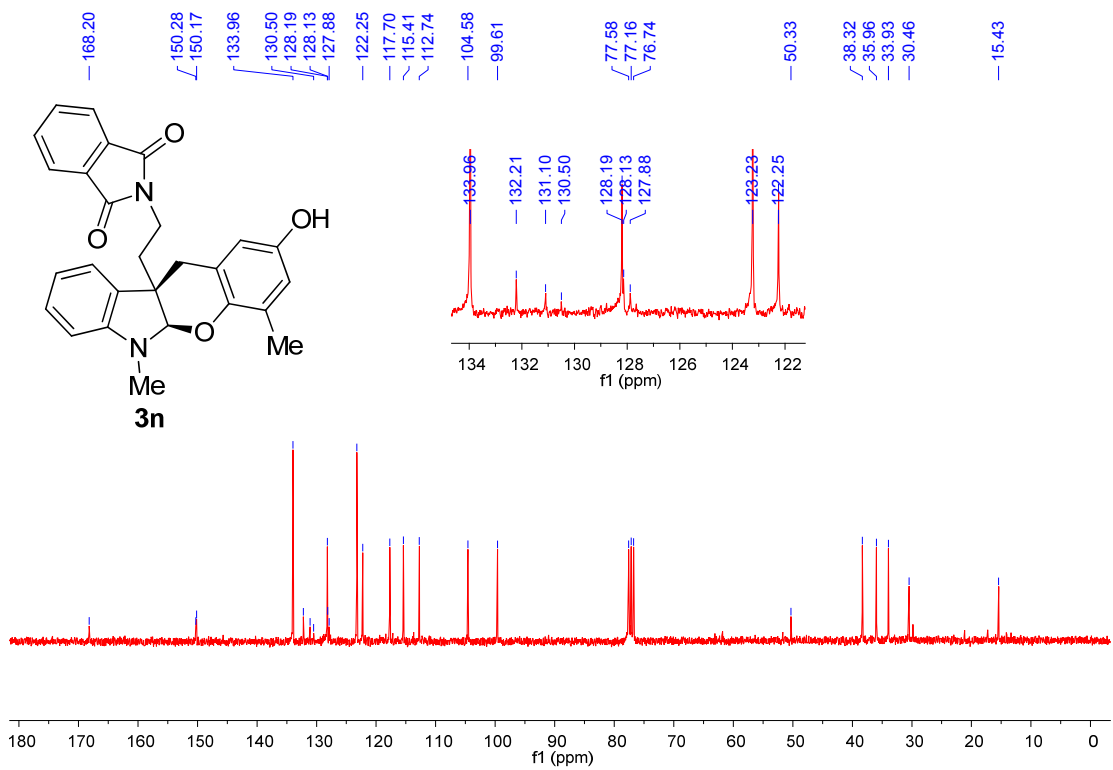

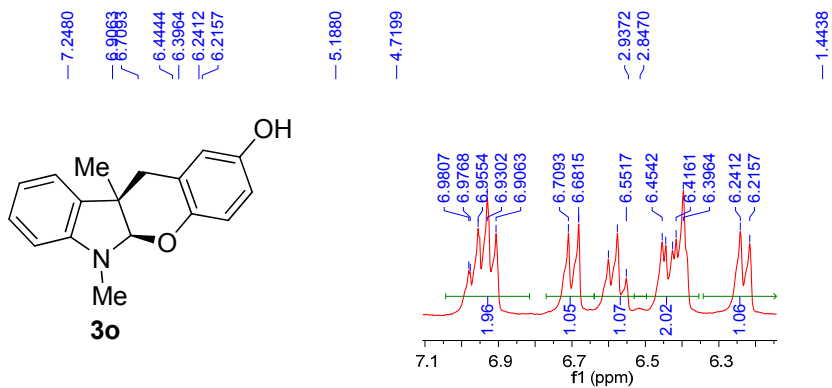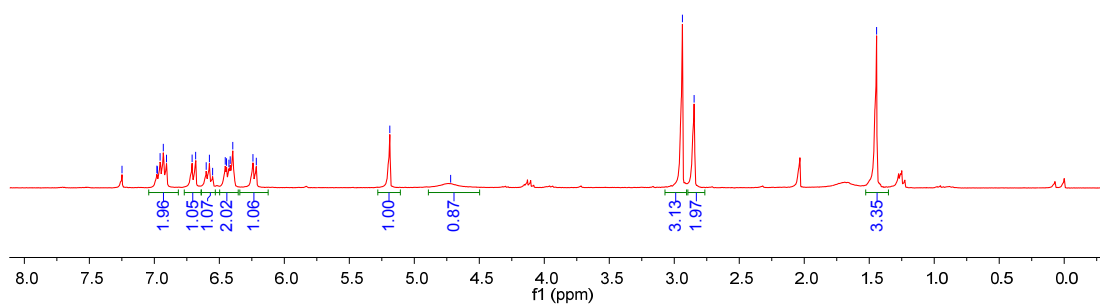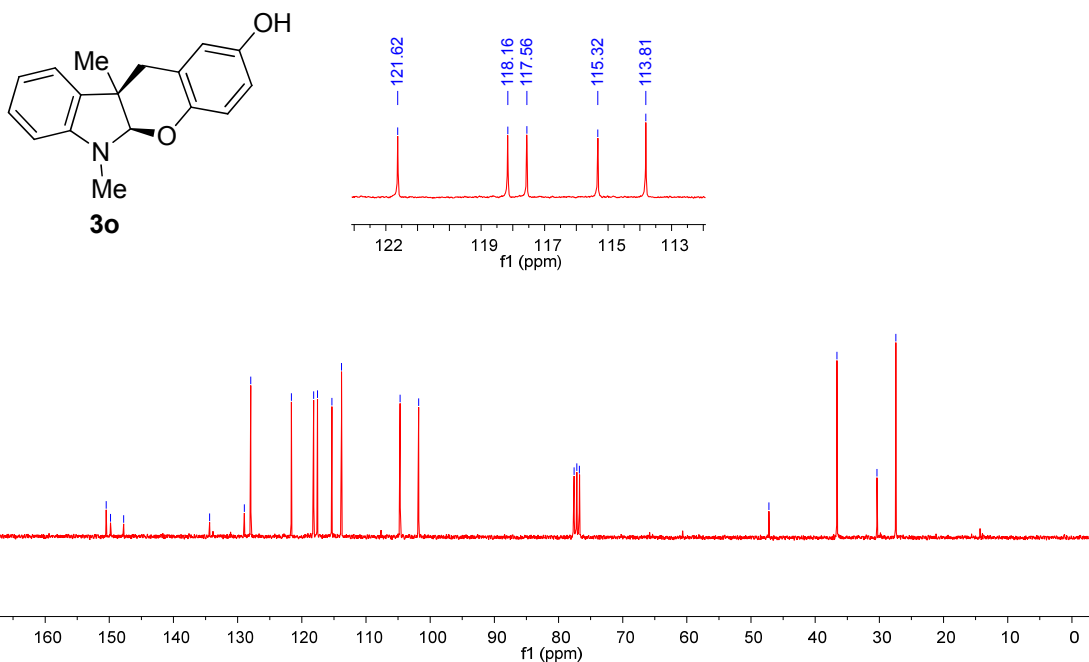



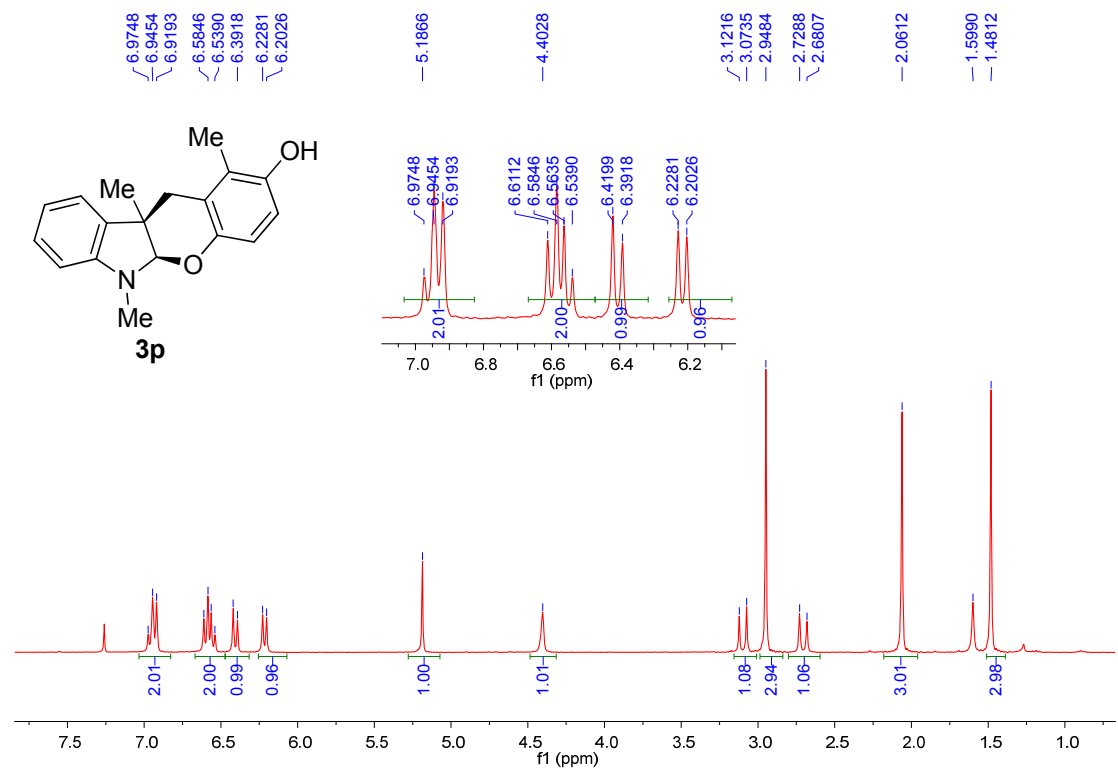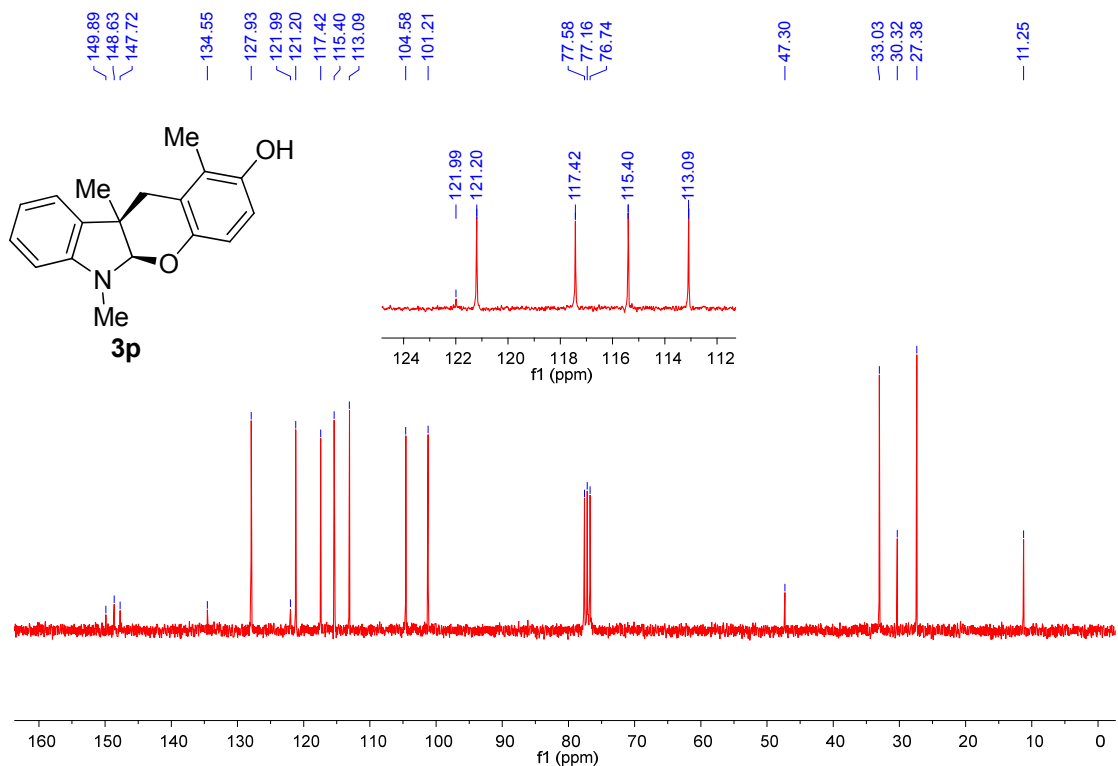

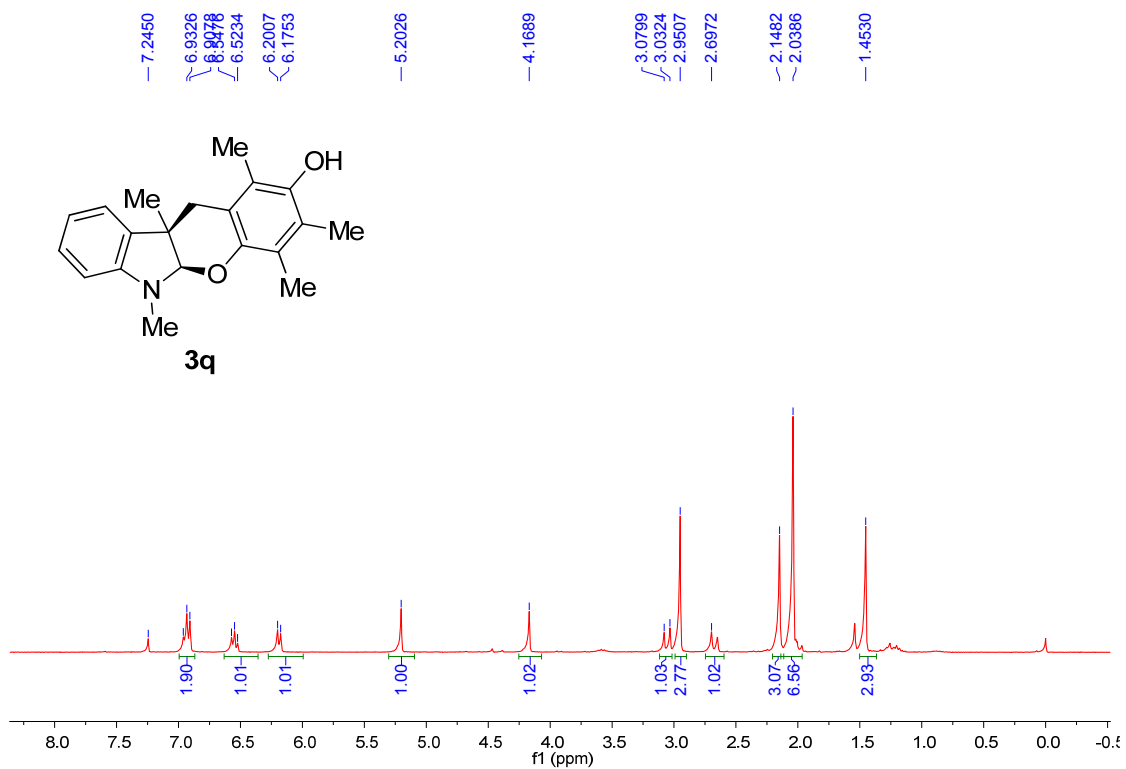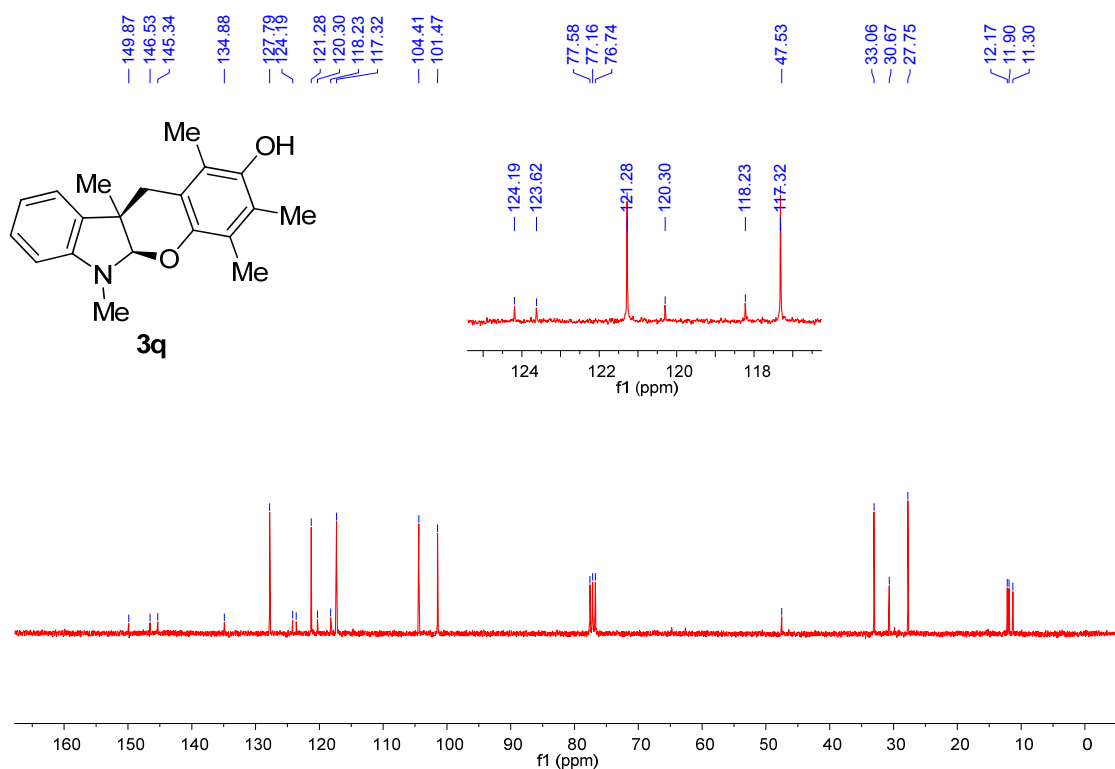

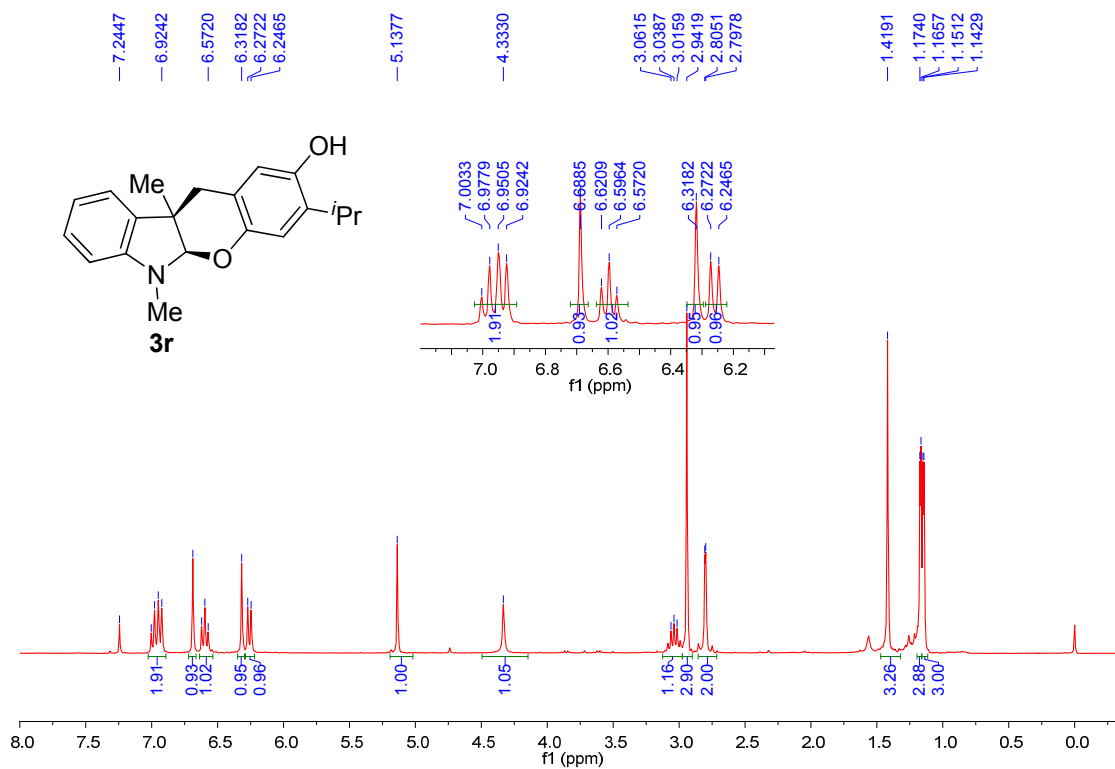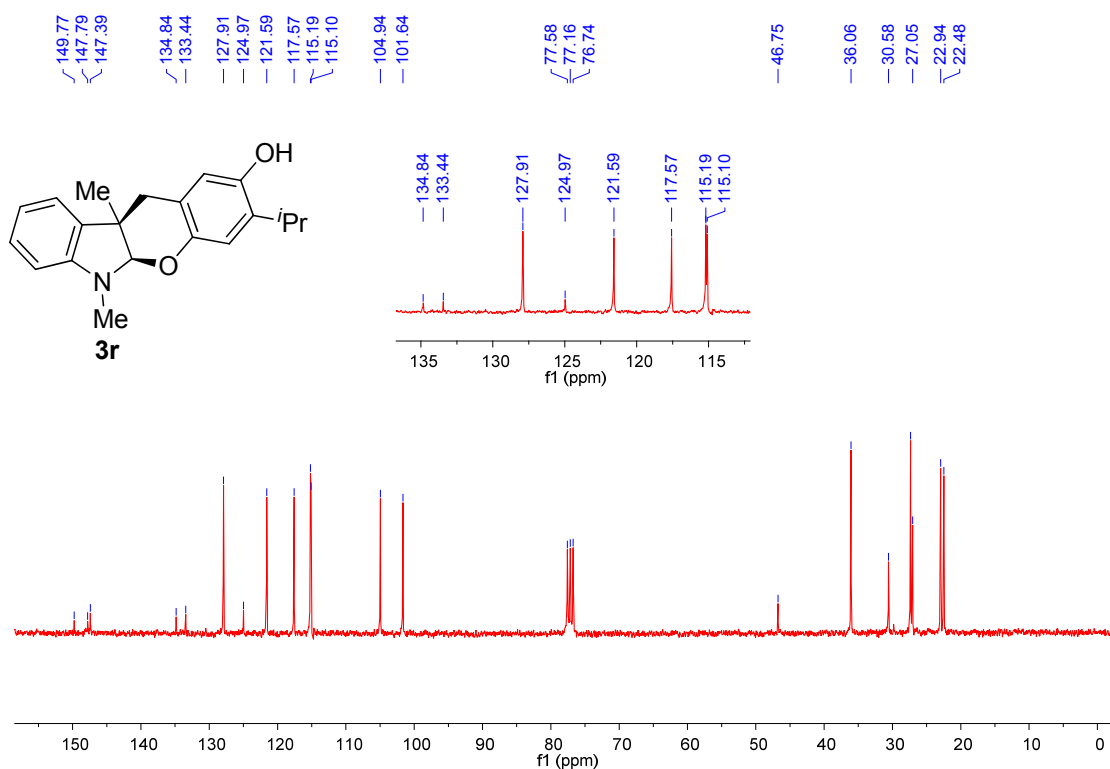

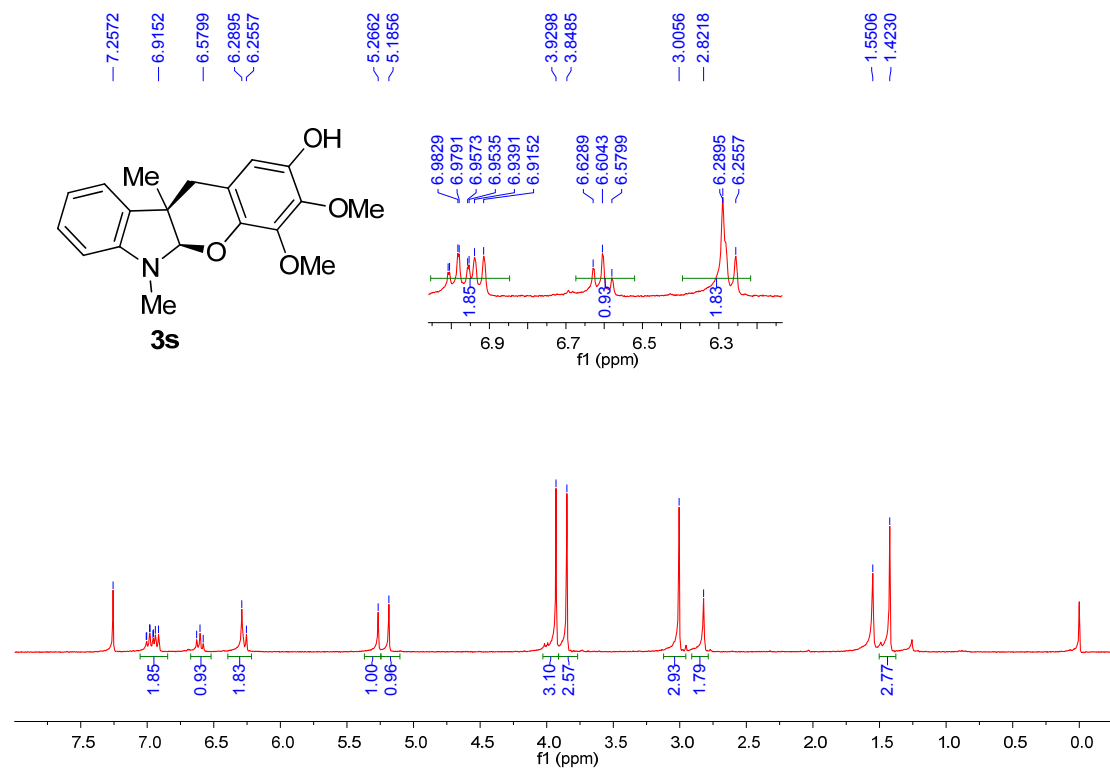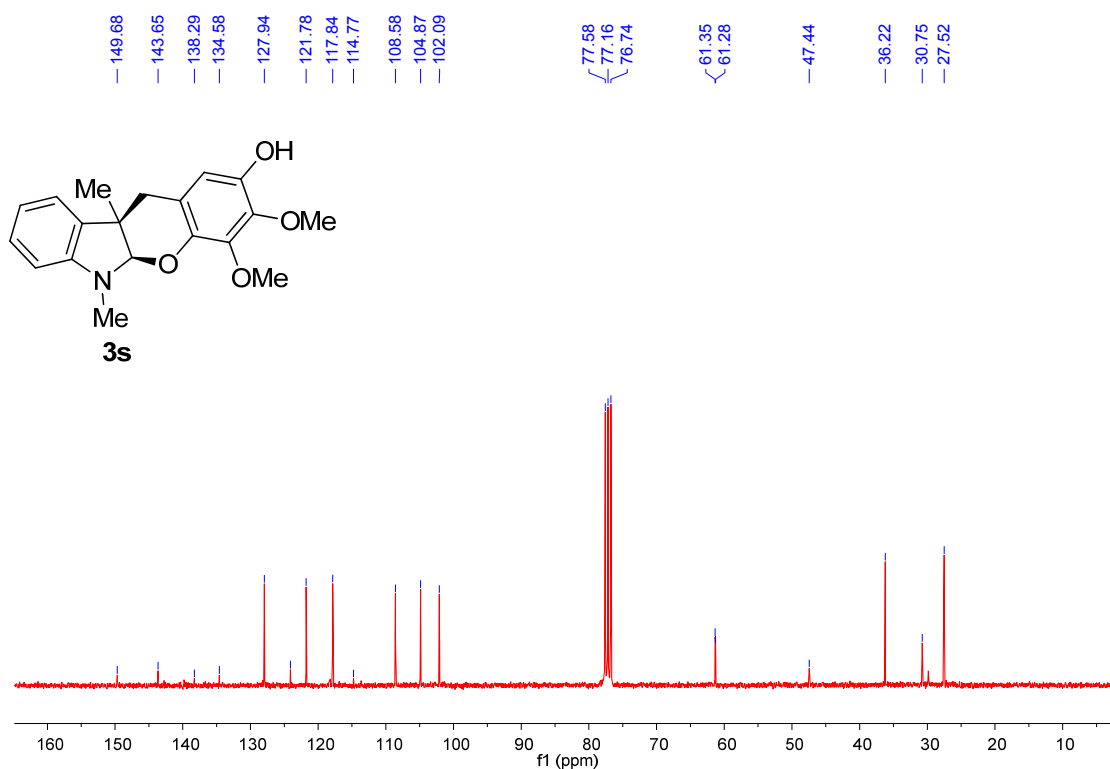

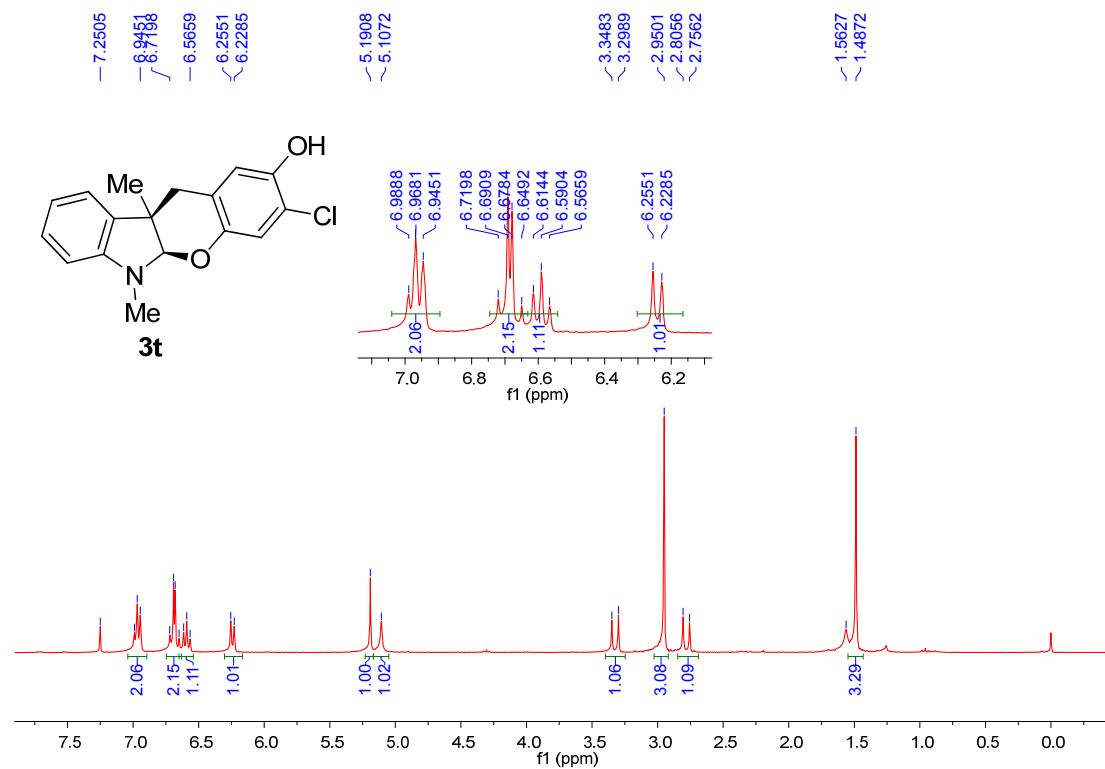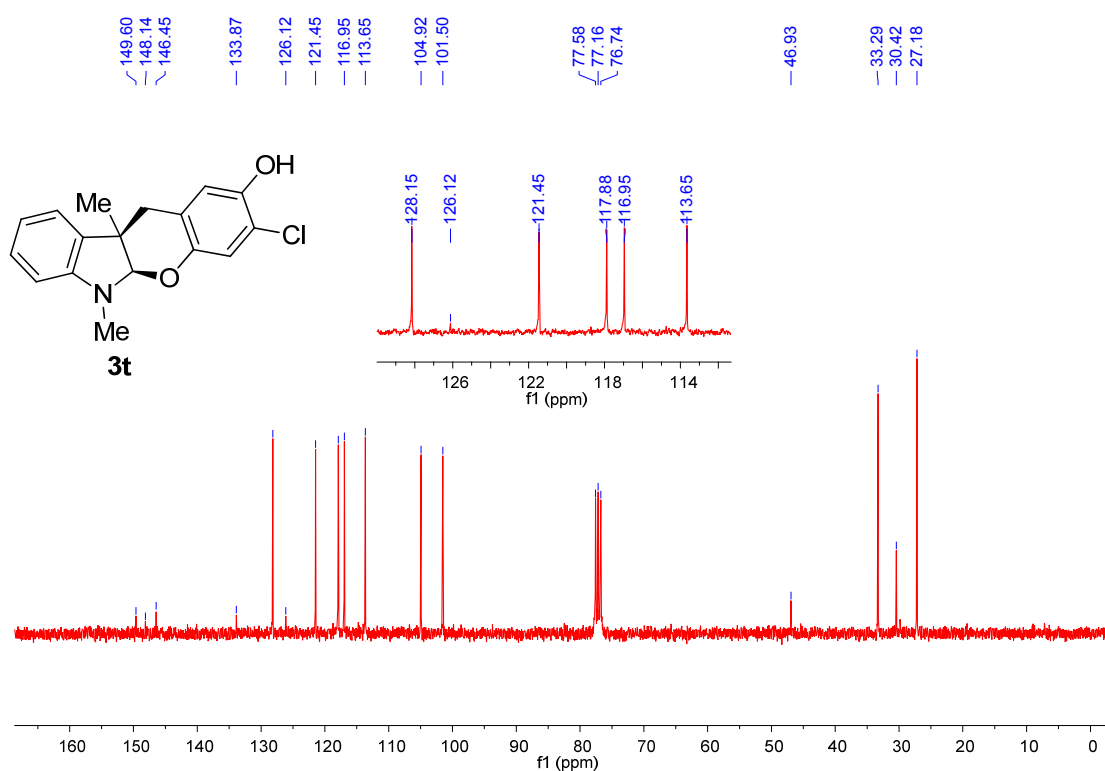

Supplement: c7ob00392g1.pdf [file c7ob00392g1.pdf]
